# Supplementary material for: Siglec-F-expressing neutrophils are essential for creating a profibrotic microenvironment in renal fibrosis.
Source: JCI journal article supplement (doi:10.1172/jci156876), 2022-06-15
Supplement: sd1 [file 1]

**Supplementary Materials for**  
**Siglec-F-expressing neutrophils are essential for creating a pro-fibrotic  
microenvironment in the obstructed kidney**

Seungwon Ryu, Jae Woo Shin, Soie Kwon, Jiwon Lee, Yong Chul Kim, Yoe-Sik Bae, Yong-Soo  
Bae, Dong Ki Kim, Yon Su Kim, Seung Hee Yang\*, Hye Young Kim\*

\*Corresponding authors. Email: ysh5794@gmail.com (SHY), hykim11@snu.ac.kr (HYK)

**This PDF file includes:**

- Figure S1. Inflammation and fibrosis evaluation in UUO-induced kidney injury.
- Figure S2. Characteristics of Siglec-F expressing neutrophils
- Figure S3. Proinflammatory cytokine analysis of injured renal tissue
- Figure S4. Cytokine and collagen 1 production by Siglec-F<sup>+</sup> neutrophils generated in vivo and in vitro
- Figure S5. Evaluation of renal injury and fibrosis by the depletion and adoptive transfer of Siglec-F<sup>+</sup> neutrophils
- Figure S6. Fibrotic changes of control and tumor tissues from nephrectomy specimen of RCC Patients

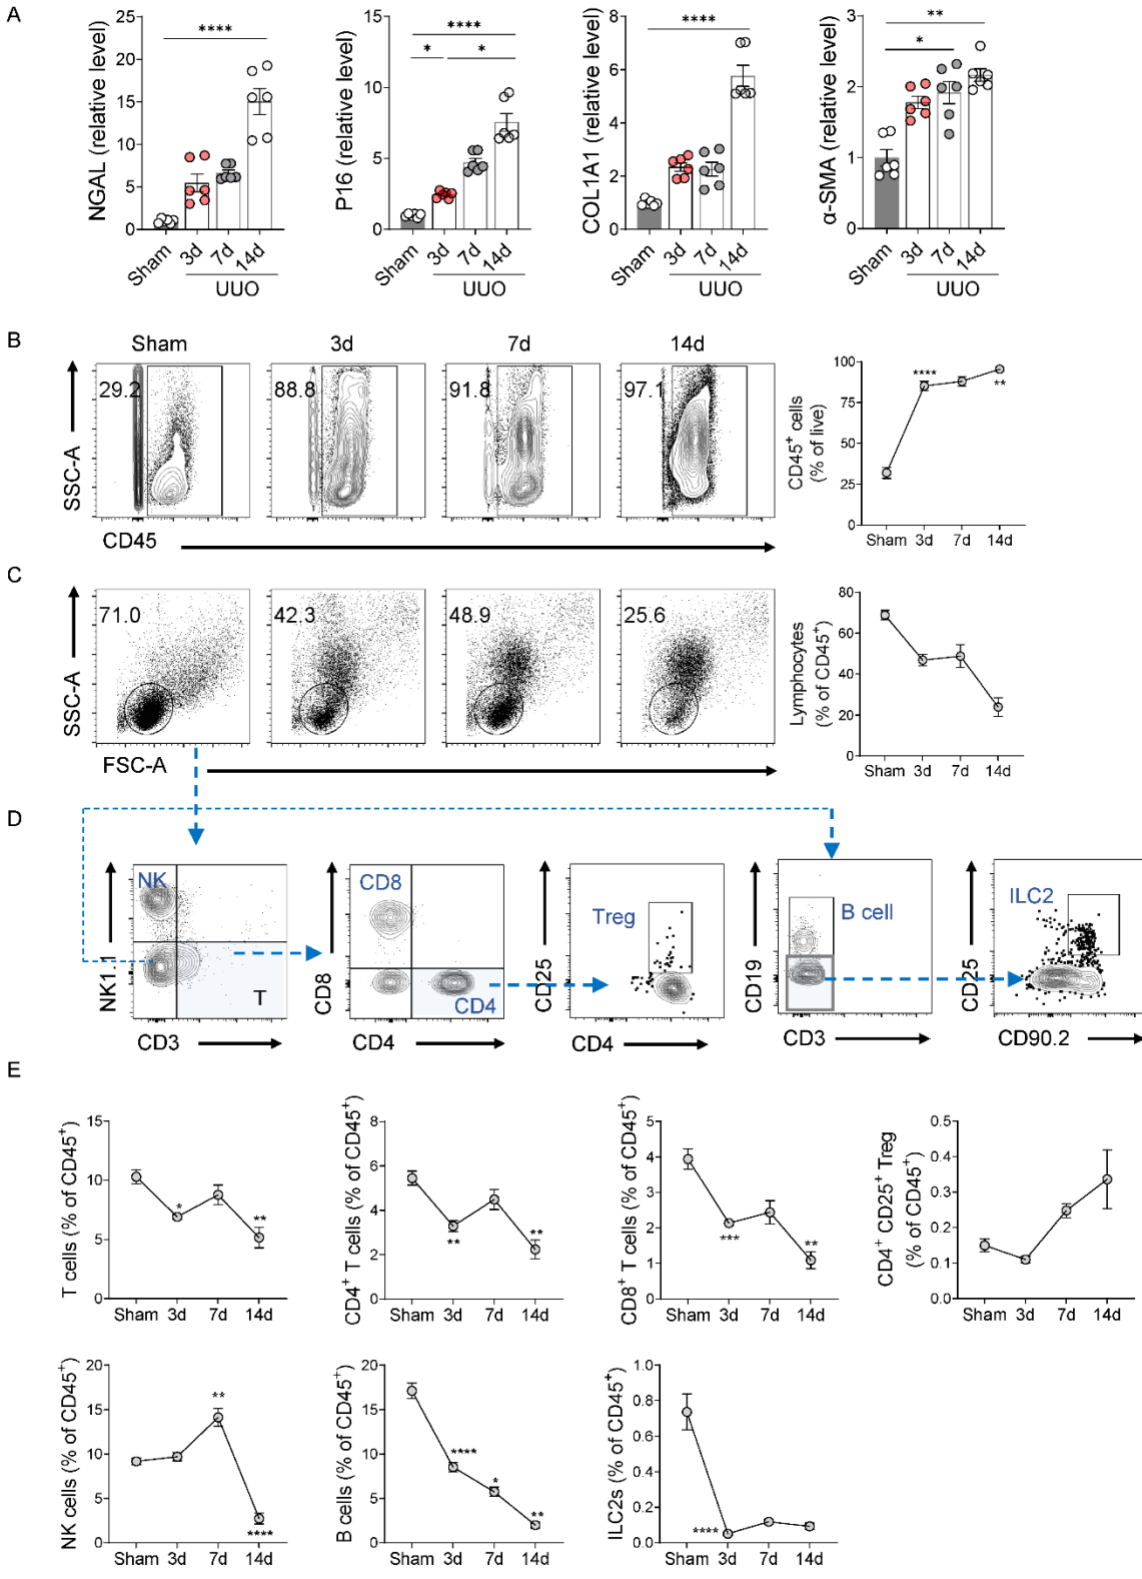

**Figure S1. Inflammation and fibrosis evaluation in UUO-induced kidney injury.** UUO induced kidney injury was induced and evaluated on days 0, 3, 7, 14 from the UUO surgery. **(A)** Relative expression of NGAL, P16, COL1A1, and  $\alpha$ -SMA evaluated by Western blot. **(B-C)** Frequency of CD45<sup>+</sup> leukocytes **(B)** and lymphocytes **(C)** analyzed with flow cytometry. **(D-E)** Immune cell profiling for total T cells, CD4<sup>+</sup>, CD8<sup>+</sup> T cells, regulatory T cells (CD4<sup>+</sup> CD25<sup>+</sup>), NK cells, B cells, and ILC2s (CD3<sup>-</sup> CD19<sup>-</sup> NK1.1<sup>-</sup> CD90.2<sup>+</sup> CD25<sup>+</sup>). All results are shown as mean  $\pm$  SEM and statistical analysis was performed using one-way ANOVA test. \* $P$ <0.05; \*\* $P$ <0.01; \*\*\* $P$ <0.001; \*\*\*\* $P$ <0.0001; n = 5-7 mice in each group.

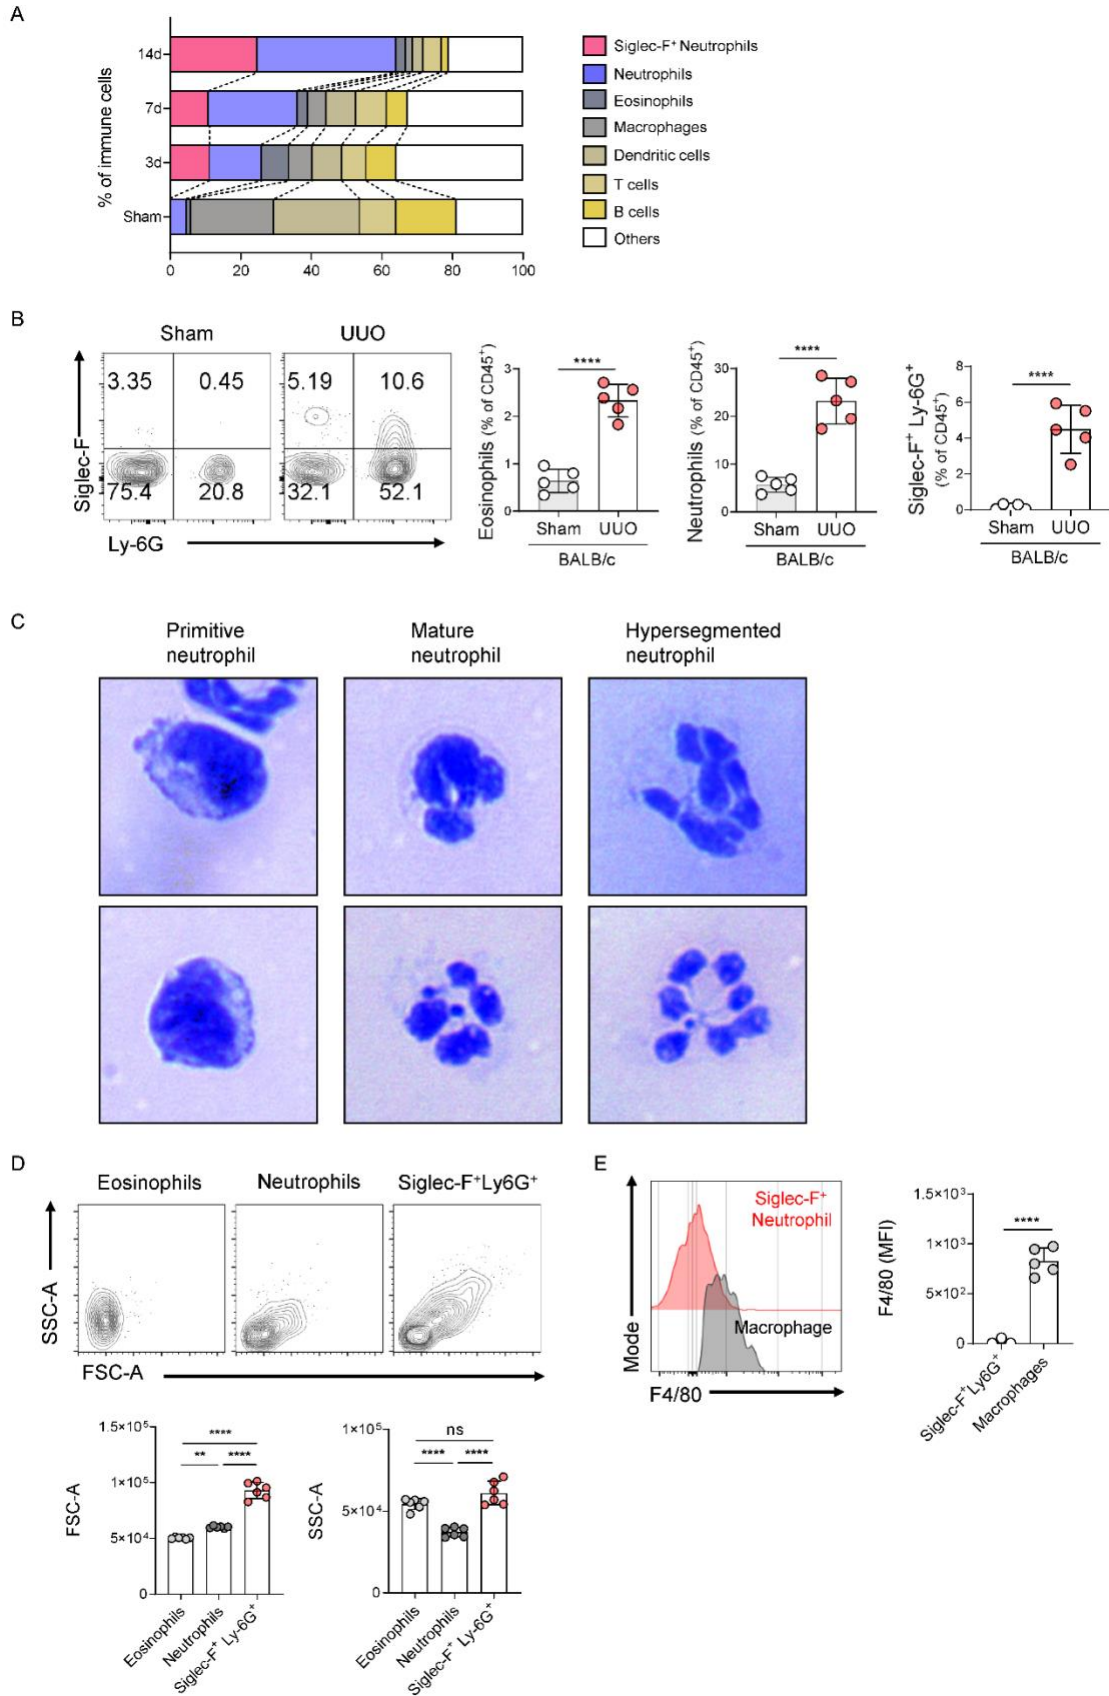

**Figure S2. Characteristics of Siglec-F expressing neutrophils.** (A) Kinetic changes of immune cells during UUO-induced renal fibrosis. (B) Siglec-F<sup>+</sup> Ly-6G<sup>+</sup> cells emerged in UUO-induced kidney on BALB/c mice. (C) Morphologies of primitive, mature, and hypersegmented neutrophils sorted on day 14. (D) Forward scatter (FSC) and side scatter (SSC) comparison between eosinophils, neutrophils, and Siglec-F<sup>+</sup> Ly-6G<sup>+</sup> cells. (E) Comparison of F4/80 expression between Siglec-F<sup>+</sup> Ly-6G<sup>+</sup> cells and macrophages from day-7 UUO kidney All results are shown as mean  $\pm$  SEM and statistical analysis was performed using Mann-Whitney test (B, E) or one-way ANOVA test (D). \* $P$ <0.05; \*\* $P$ <0.01; \*\*\* $P$ <0.001; \*\*\*\* $P$ <0.0001; n = 5-7 mice in each group.

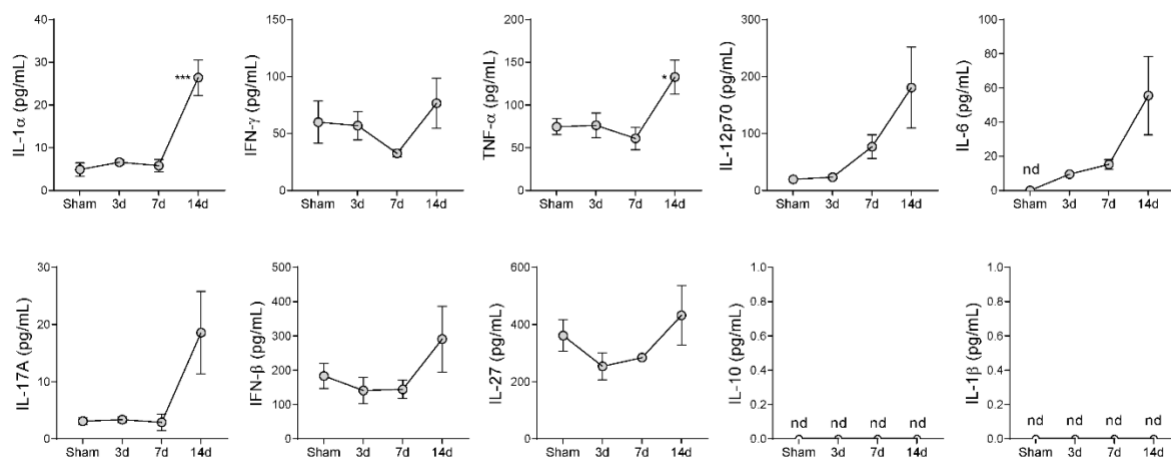

**Figure S3. Proinflammatory cytokine analysis of injured renal tissue.** Cytokine bead arrays were used to analyze the proinflammatory cytokines increased in the UO induced renal injury. All results are shown as mean  $\pm$  SEM and statistical analysis was performed using one-way ANOVA test. \* $P < 0.05$ ; \*\*\* $P < 0.001$ ;  $n = 4-5$  mice in each group. ns, not significant.

A

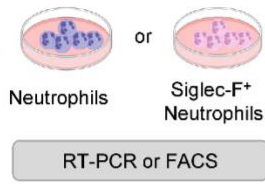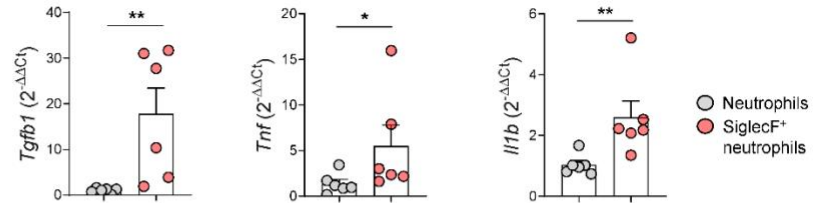

B

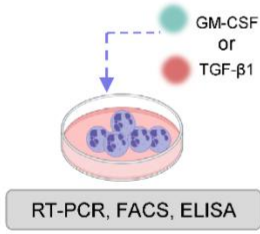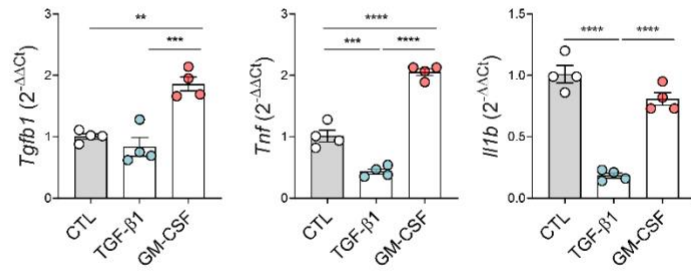

C

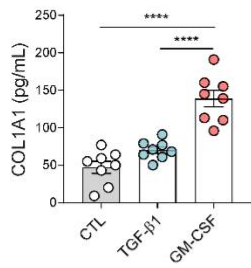

D

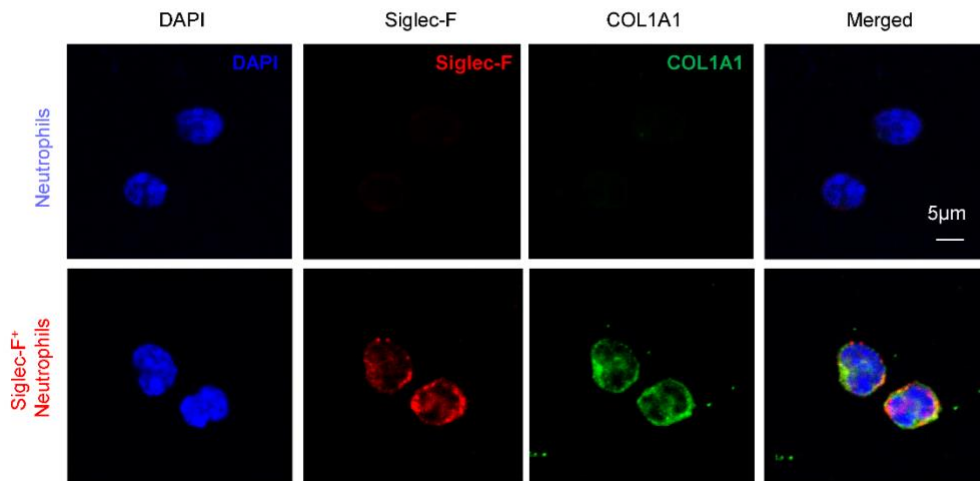

**Figure S4. Cytokine and collagen 1 production by Siglec-F<sup>+</sup> neutrophils generated in vivo and in vitro.** (A) RT-qPCR analysis of sorted neutrophils and Siglec-F<sup>+</sup> neutrophils from UUO-induced kidney (n = 6 in each group). (B) RT-qPCR analysis of TGF-β1 or GM-CSF primed neutrophils (n = 4 in each group). (C-D) COL1A1 expression of TGF-β1 or GM-CSF primed neutrophils evaluated by ELISA (n = 8 in each group) (C) and immunofluorescence (D). All results are shown as mean ± SEM and statistical analysis was performed using Mann-Whitney test (A) or one-way ANOVA test (B-C). \**P*<0.05; \*\**P*<0.01; \*\*\**P*<0.001; \*\*\*\**P*<0.0001.



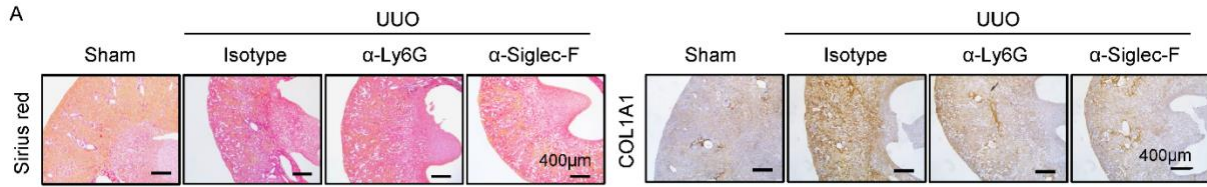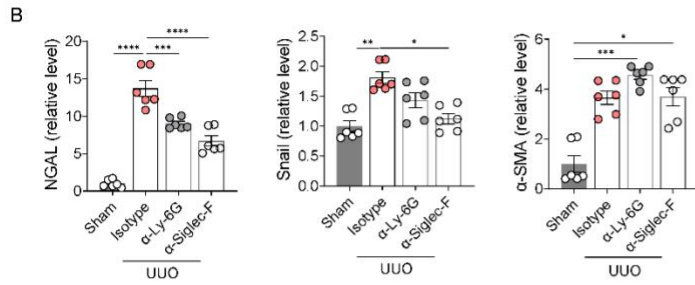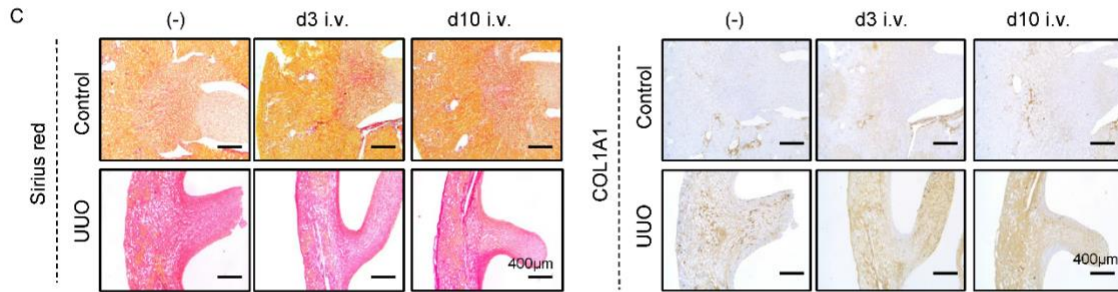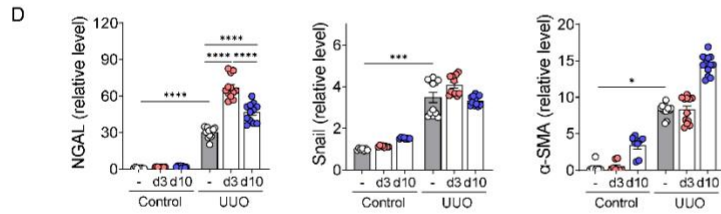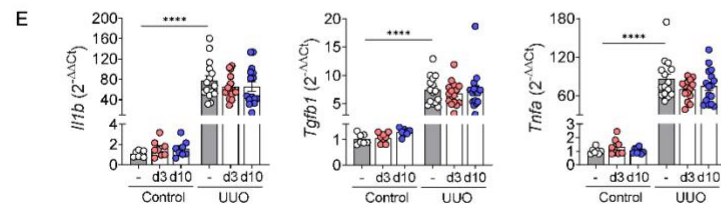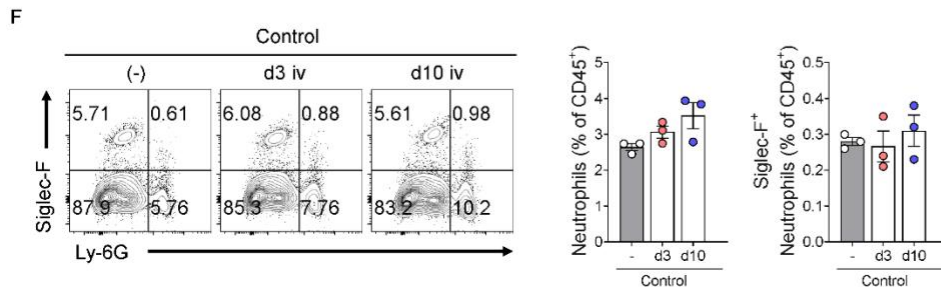

**Figure S5. Evaluation of renal injury and fibrosis by the depletion and adoptive transfer of Siglec-F<sup>+</sup> neutrophils.** (A-B) Sirius red and COL1A1 staining (A), and NGAL, Snail, and  $\alpha$ -SMA expression (B) of Siglec-F<sup>+</sup> neutrophil depleted UUO mice. (C-D) Sirius red and COL1A1 staining (C), and NGAL, Snail, and  $\alpha$ -SMA expression (D) of control or UUO mice adoptively transferred with Siglec-F<sup>+</sup> neutrophils. (E) Proinflammatory cytokines expressed on renal tissues of Siglec-F<sup>+</sup> neutrophil-transferred control or UUO mouse kidneys. (F) Conventional and Siglec-F<sup>+</sup> neutrophils in Siglec-F<sup>+</sup> neutrophil transferred control mouse kidneys. All results are shown as mean  $\pm$  SEM and statistical analysis was performed using one-way ANOVA test. \* $P$ <0.05; \*\* $P$ <0.01; \*\*\* $P$ <0.001; \*\*\*\* $P$ <0.0001; n = 6-7 mice in each group for A-B, n=7-16 mice in each group for C-E. and n=3 mice in each group for F.

A

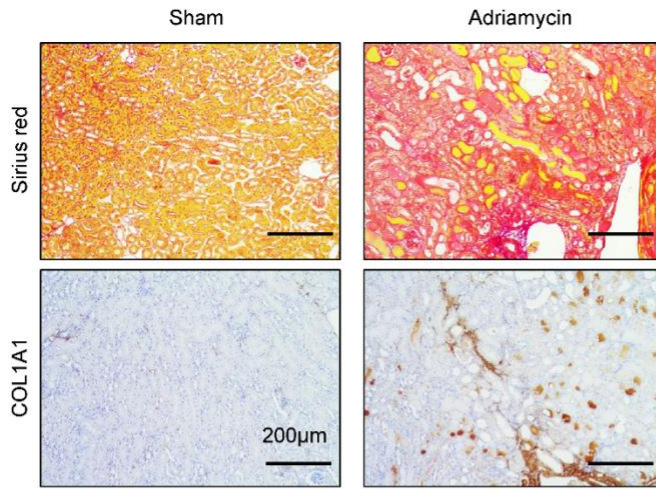

B

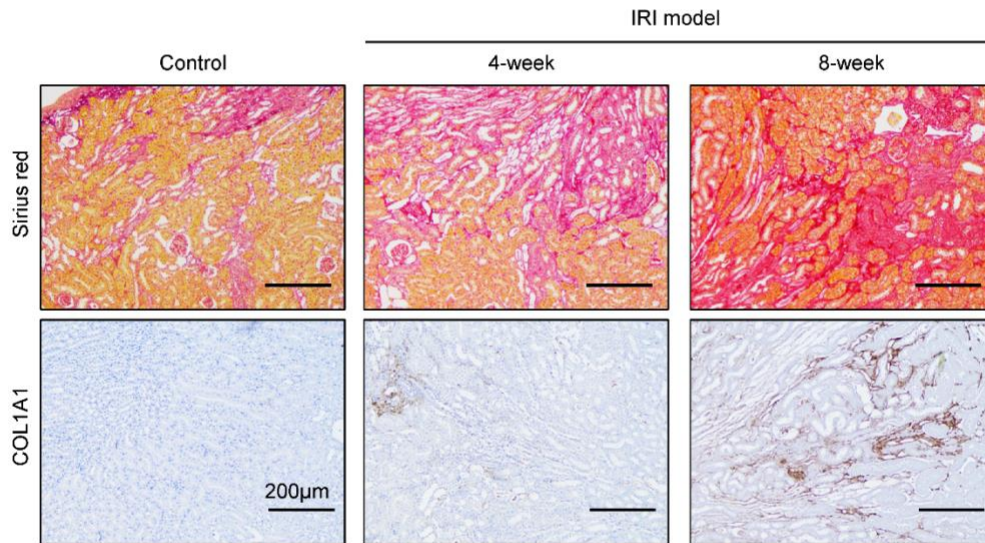

C

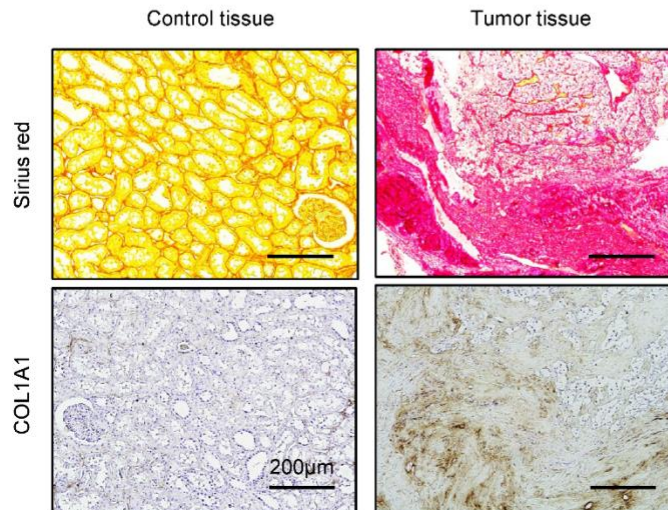

**Figure S6. Fibrotic changes of other murine CKD models and tumor tissues from nephrectomy specimen of RCC patients.** Sirius-red and COL1A1 immunohistochemistry of (A) Adriamycin model, (B) renal IRI model, and (C) tumor tissues from RCC patients.
